# Supplementary material for: Clinicopathological Features and Survival Outcomes of Primary Pulmonary Invasive Mucinous Adenocarcinoma
Source: MDPI journal article supplement (doi:10.3390/cancers13164103), 2021-08-15
Supplement: s1 [file s1]

## Supplementary Materials and Methods

**Table S1.** Primers used for *NRG* fusions and *HER2* transmembrane domain.

| Gene                                   | Forward                        | Reverse                       |
|----------------------------------------|--------------------------------|-------------------------------|
| <i>SLC3A2-NRG1</i> fusion              | 5' - CTGACTTGCTGCAGATCGAC -3'  | 5' - ATCTCGAGGGGTTTGAAAGG -3' |
| <i>VAMP2-NRG1</i> fusion               | 5' - GCCATCATCCTCATCATCATC -3' | 5' - ATCTCGAGGGGTTTGAAAGG -3' |
| <i>HER2</i> transmembrane domain (TMD) | 5' - CGGTGTGAAACCTGACCTCT -3'  | 5' - CAGCTCCGTCTCTTTCAGGA -3' |

**a**

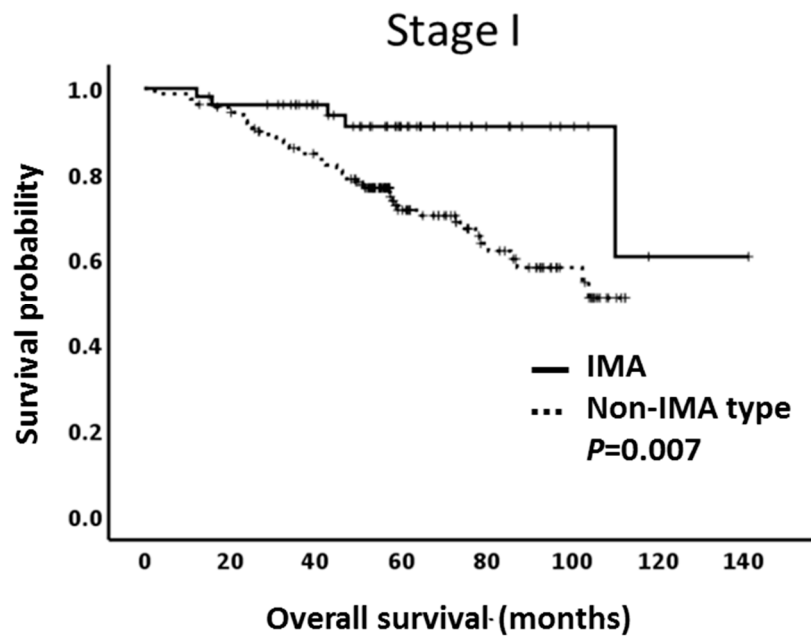

**b**

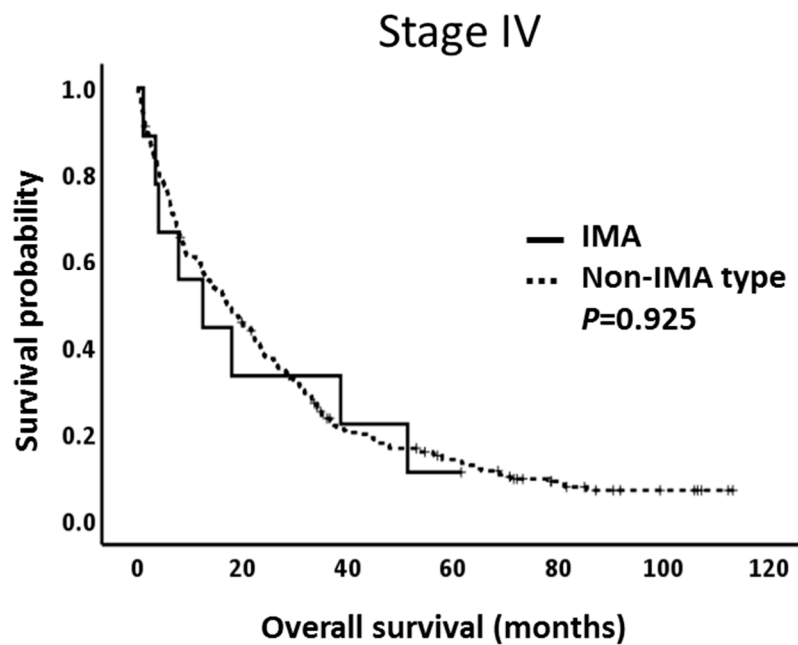

**Supplementary Figure S1.** Kaplan-Meier curves of overall survival (OS) of (a) Stage I (b) Stage IV patients with pulmonary invasive mucinous adenocarcinoma and non-IMA type adenocarcinoma.
